1 **Targeting of NF- $\kappa$ B to Dendritic Spines is Required for Synaptic Signaling and**  
2 **Spine Development**

3

4

5 **Authors:** Erica C. Dresselhaus<sup>1</sup>, Matthew C.H. Boersma<sup>2</sup>, and Mollie K. Meffert<sup>1,2,#</sup>

6

7 **Affiliations:**

8 <sup>1</sup>Department of Biological Chemistry

9 <sup>2</sup>Solomon H. Snyder Department of Neuroscience

10 #Corresponding author

11 The Johns Hopkins University School of Medicine, Baltimore, MD 21205, USA

12 Email: [mkm@jhmi.edu](mailto:mkm@jhmi.edu)

13

14 **Running Title: Dendritic Spine NF- $\kappa$ B Mediates Synaptic Signaling**

15 **Number of Pages: 33**

16 **Number of Figures: 4**

17 **Number of words: Abstract: 189, Significance: 120, Introduction: 571,**

18 **Discussion: 852**

19 **Conflict of interest:** The authors declare no competing financial interests.

20

21 **ACKNOWLEDGMENTS**

22 This work was supported by the Braude Foundation, NIH MH109341 and MH098016 (to

23 M.K.M.), and NS050274 (to Hopkins Neuroscience Multiphoton Facility). We thank C.

24 K. Timmerman for regenerating a key mouse line, M.Pasparakis for GFPRelA and

25 RelA<sup>F/F</sup> mouse lines, T.R. Gamache for assistance with analysis of p65 amino acid

26 sequence, and J.L. Pomerantz and members of the Meffert laboratory for discussion  
27 and critical reading of the manuscript.

28

## 29 **ABSTRACT**

30 Long-term forms of brain plasticity share a requirement for changes in gene expression  
31 induced by neuronal activity. Mechanisms that determine how the distinct and  
32 overlapping functions of multiple activity-responsive transcription factors, including  
33 nuclear factor kappa B (NF- $\kappa$ B), give rise to stimulus-appropriate neuronal responses  
34 remain unclear. We report that the p65/RelA subunit of NF- $\kappa$ B confers subcellular  
35 enrichment at neuronal dendritic spines and engineer a p65 mutant that lacks spine-  
36 enrichment ( $\Delta$ SEp65) but retains inherent transcriptional activity equivalent to wild-type  
37 p65. Wild-type p65 or  $\Delta$ SEp65 both rescue NF- $\kappa$ B-dependent gene expression in p65-  
38 deficient murine hippocampal neurons responding to diffuse (PMA/ionomycin)  
39 stimulation. In contrast, neurons lacking spine-enriched NF- $\kappa$ B are selectively impaired  
40 in NF- $\kappa$ B-dependent gene expression induced by elevated excitatory synaptic  
41 stimulation (bicuculline or glycine). We used the setting of excitatory synaptic activity  
42 during development that produces NF- $\kappa$ B-dependent growth of dendritic spines to test  
43 physiological function of spine-enriched NF- $\kappa$ B in an activity-dependent response.  
44 Expression of wild-type p65, but not  $\Delta$ SEp65, is capable of rescuing spine density to  
45 normal levels in p65-deficient pyramidal neurons. Collectively, these data reveal that  
46 spatial localization in dendritic spines contributes unique capacities to the NF- $\kappa$ B  
47 transcription factor in synaptic activity-dependent responses.

48

## 49 **SIGNIFICANCE STATEMENT**

50           Extensive research has established a model in which the regulation of neuronal  
51 gene expression enables enduring forms of plasticity and learning. However,  
52 mechanisms imparting stimulus-specificity to gene regulation, insuring biologically  
53 appropriate responses, remain incompletely understood. NF- $\kappa$ B is a potent  
54 transcription factor with evolutionarily-conserved functions in learning and the growth of  
55 excitatory synaptic contacts. Neuronal NF- $\kappa$ B is localized in both synapse and somatic  
56 compartments, but whether the synaptic pool of NF- $\kappa$ B has discrete functions is  
57 unknown. This study reveals that NF- $\kappa$ B enriched in dendritic spines (the postsynaptic  
58 sites of excitatory contacts) is selectively required for NF- $\kappa$ B activation by synaptic  
59 stimulation and normal dendritic spine development. These results support spatial  
60 localization at synapses as a key variable mediating selective stimulus-response  
61 coupling.

62

## 63 **INTRODUCTION**

64           Elucidating the mechanisms that allow cells to make stimulus-appropriate  
65 responses remains one of the most compelling questions in the field of gene  
66 expression. While cell-type specific transcription is heavily influenced by promoter  
67 accessibility, factors conferring stimulus-specificity to transcription have remained more  
68 elusive. Post-mitotic neurons in the adult brain are capable of differential activity-  
69 dependent gene regulation in response to seemingly subtle differences in stimuli  
70 patterns, magnitude, and duration. Mechanisms that precisely regulate gene target  
71 specificity dictate changes in the complement of neuronal proteins and, ultimately, such

72 critical fates as whether neurons live or die, and whether synaptic connections are  
73 appropriately strengthened, weakened, or eliminated during processes such as  
74 information storage. Signaling cascades triggered downstream of neuronal activity by  
75 neurotransmitters, growth factors, and cytokines can individually and cooperatively  
76 induce multiple activity-responsive transcription factors, including CREB, Npas4, MEF2,  
77 MeCP2 (Nonaka et al., 2014), and nuclear factor-kappaB (NF- $\kappa$ B) (Shrum and Meffert,  
78 2008). How these discrete transcription factors contribute unique or overlapping  
79 functions to disambiguate incoming signals and to orchestrate context appropriate  
80 changes in gene expression remains incompletely understood.

81       NF- $\kappa$ B transcription factors exhibit evolutionarily-conserved requirements in a  
82 wide variety of learning and memory paradigms (Freudenthal and Romano, 2000;  
83 Meffert et al., 2003; Freudenthal et al., 2005; Kaltschmidt et al., 2006; O'Riordan et al.,  
84 2006). NF- $\kappa$ B functions as a homo- or heterodimer of five possible mammalian  
85 subunits: p65 (also termed RelA), RelB, c-Rel, p50, and p52. The p65:p50 heterodimer  
86 is the most common NF- $\kappa$ B dimer in mammalian brain. Preformed NF- $\kappa$ B dimers are  
87 held latent in the cytoplasm by the NF- $\kappa$ B inhibitor, I $\kappa$ B until stimulus-induced  
88 phosphorylation and degradation of I $\kappa$ B allows stable nuclear translocation of active NF-  
89  $\kappa$ B. NF- $\kappa$ B is present in neuronal somatic and dendritic cytoplasm and has been  
90 reported at synapses in both the *drosophila* neuromuscular junction (Heckscher et al.,  
91 2007) and in the mammalian CNS (Kaltschmidt et al., 1993) where synaptic NF- $\kappa$ B can  
92 be activated by excitatory stimulation (Meffert et al., 2003). Consistent with these  
93 results, components of the NF- $\kappa$ B activation pathway are also localized at synapses  
94 (Meffert et al., 2003). Previous work by our lab showed that NF- $\kappa$ B can be enriched in

95 the postsynaptic compartment of dendritic spines from hippocampal neurons (Boersma  
96 et al., 2011), however, the potential for this localization to impart specific roles in  
97 activity-dependent responses was unknown.

98 In this study, we demonstrate that the p65 subunit of NF- $\kappa$ B is required for  
99 enrichment of the p65:p50 NF- $\kappa$ B dimer at dendritic spines and utilize a mutant p65  
100 engineered to prevent spine-enrichment (p65 $\Delta$ SE) to probe potential functions of NF- $\kappa$ B  
101 subcellular localization near neuronal synapses. Our results show that neurons lacking  
102 the spine-enriched pool of NF- $\kappa$ B are selectively deficient in NF- $\kappa$ B-dependent gene  
103 expression by stimuli delivered through excitatory synapses, while remaining competent  
104 to respond to stimulation that is not incoming through synapses. We assess a biological  
105 role for the spine-enriched pool of NF- $\kappa$ B using a model of hippocampal developmental  
106 synaptogenesis in which ongoing activation of NF- $\kappa$ B by elevated basal excitatory  
107 neurotransmission (Meffert et al., 2003; Mihalas et al., 2013) is required for appropriate  
108 dendritic spine formation (Boersma et al., 2011). In p65-deficient neurons, expression  
109 of wild-type p65, but not p65 lacking spine-enrichment (p65 $\Delta$ SE), can rescue normal  
110 dendritic spine density in developing hippocampal neurons. Collectively, these findings  
111 reveal that subcellular localization is a salient feature in producing stimulus-specificity  
112 for activity-dependent gene expression and reveal a selective physiological function for  
113 the spine-enriched pool of NF- $\kappa$ B transcription factor in response to excitatory  
114 transmission and in dendritic spine development.

115

## 116 **MATERIALS and METHODS**

117 *Animals and Primary Cultures*

118 The care and use of mice met all guidelines of the local Institutional Animal Care and  
119 Use Committee (The Johns Hopkins University School of Medicine).  
120 Hippocampal neurons were dissociated from post-natal day 0 (P0) wild-type (ICR),  
121 RelA<sup>F/F</sup>, or GFPRelA<sup>F/F</sup> (De Lorenzi et al., 2009) male and female mouse pups and  
122 prepared as described in (Boersma et al., 2011). Cultures were transfected as  
123 described in (Boersma et al., 2011).

124

### 125 *Imaging and quantification*

126 Confocal images of live murine hippocampal neurons were acquired on a Zeiss confocal  
127 microscope (LSM5 Pascal), and analyzed as described (Boersma et al., 2011). Briefly,  
128 fluorescence intensity in regions of interest (ROI) within dendritic spines and adjacent  
129 dendritic shafts from Z-stacks containing the entire neurons or process of interest were  
130 measured (ImageJ software) and analyzed using the following equations:

131 Normalized spine fluorescence (NSF) =

132  $(EGFP_{\text{spine}}/mCherry_{\text{spine}}) / (EGFP_{\text{dendrite}}/mCherry_{\text{dendrite}})$

133

134 Percentage change in fluorescence =

135  $[NSF(p65\text{tagged})-NSF(\text{nontagged fluorescent protein})] / NSF(\text{nontagged fluorescent}$   
136  $\text{protein})$

137

138 Spine enrichment for endogenous GFPp65 was analyzed using expressed mCherry to  
139 mask the dendrite of interest (Imaris Bitplane software) and the spot function to place  
140 and quantify fluorescence for mCherry and GFP in spine-head ROIs.

141

## 142 *Neuronal Stimulation*

143 DIV 20 - 21 hippocampal neuronal cultures from RelA<sup>F/F</sup> mice (+ OHT) expressing either  
144 full length GFPp65 or GFPp65 $\Delta$ SE were treated with synaptic or diffuse global stimuli at  
145 37°C for 3.5 hours prior to harvest, as follows. For diffuse stimulation cultures were  
146 treated with Ionomycin (2  $\mu$ M, EMD, 407951) and phorbol 12-myristate 13-acetate  
147 (PMA, 50 ng/ml, LC Labs, P-1680). For synaptic stimulation, neuronal cultures were  
148 either treated with bicuculline or with glycine in a low-dose version of chemical LTP.  
149 Bicuculline methobromide (30  $\mu$ M, Tocris, 0109) was delivered for 30 seconds followed  
150 by 1x stop solution (100x stock: 1 mM kynurenic acid, 1 M MgCl<sub>2</sub>, 0.3 M NaOH, 500  
151 mM NaHEPES, pH 7.3). For low-dose glycine stimulation, neuronal cultures were  
152 incubated with solution A (ACSF (130 mM NaCl, 3 mM KCl, 1.8 mM CaCl<sub>2</sub>, 2 mM  
153 MgCl<sub>2</sub>, 10 mM HEPES pH7.4, 10 mM D-Glucose), 1  $\mu$ M Strychnine, 0.5  $\mu$ M TTX (Tocris  
154 Bioscience)) for 10 minutes at 37°C, followed by 10 minutes with solution B (ACSF-  
155 0Mg + 150  $\mu$ M Glycine, 1  $\mu$ M Strychnine, 0.5  $\mu$ M TTX) and then with solution A again for  
156 3.5 hours at 37°C. Two distinct IKK (I $\kappa$ B kinase) inhibitors were used, where indicated.  
157 The selective IKK inhibitor TPCA-1 (2-[(Aminocarbonyl)amino]-5-(4-fluorophenyl)-3-  
158 thiophenecarboxamide, Tocris, 4  $\mu$ M) or its vehicle, DMSO (dimethyl sulfoxide), or a  
159 TAT peptide coupled membrane-permeant nemo binding domain (NBD) peptide (ENZO,  
160 ALX-163-011) or control TAT peptide (ENZO, ALX-168-R050), both at 20  $\mu$ M. IKK  
161 inhibitors were pre-incubated with neuronal cultures for 30 minutes prior to stimulation.

162

## 163 *Expression constructs and lentiviral preparation*

164 Human p65, and p50 constructs were cloned by in-frame insertion using HindIII and  
165 BamHI into the Clontech C1 vector at the C terminus of enhanced green fluorescent  
166 protein (eGFP). p65 truncation mutants were created by PCR. Deletion mutants of p65  
167 were created by two-step PCR.

168 PCR Primers:

169 p65 $\Delta$ 1-298: F-GTACGTAAGCTTCTGAGAAACGTAAGGACATATG,

170 R-GTACGTGGATCCTTAGGAGCTGATCTGACT

171 p65 $\Delta$ 305-406: F1-GTGCAAGCTTTAGACGAACTGTTCCCCCTCATCTTCCCG,

172 R1-CGTAGGATCCAAGGAGCTGATCTGACTCAGCAGGGCTGA,

173 F2-AAACGTAAAAGGACAGCCCCAGCCCCTGTCCCAGTC,

174 R2-GACAGGGGCTGGGGCTGTCCTTTTACGTTTCTCCTCAATCCGGTG

175 p65 $\Delta$ 335-442: F1-GTGCAAGCTTTAGACGAACTGTTCCCCCTCATCTTCCCG,

176 R1-CGTAGGATCCAAGGAGCTGATCTGACTCAGCAGGGCTGA,

177 F2-AAACGTAAAAGGACAGCCCCAGCCCCTGTCCCAGTC,

178 F2-ATTGCTGTGCCTTCCCAGCTGCAGTTTGATGATGAAGACCTGGGG,

179 R2-ATCAAAGTGCAGCTGGGAAGGCACAGCAATGCGTCCG

180

181 Lentivirus production from eBFP2-CreER<sup>T2</sup> and eGFP2-CreER<sup>T2</sup> were as described  
182 (Boersma et al., 2011; Mihalas et al., 2013). Hippocampal cultures from RelA<sup>ff</sup> mice  
183 were infected with CreER<sup>T2</sup>-expressing lentivirus at DIV 2 and treated with tamoxifen  
184 (OHT; 400nM, Sigma-Aldrich H6278) to elicit recombination for 4 days prior to  
185 experimentation.

186



187 *Reporter assays*

188 Luciferase reporter assays were performed as described (Mihalas et al., 2013) by co-  
189 expressing firefly luciferase under the control of a promoter containing one or three NF-  
190  $\kappa$ B consensus binding sites in HEK293T and neurons, respectively, together with  
191 constitutively-expressed  $\beta$ -galactosidase (from pEF-Bos-LacZ), which was used to  
192 normalize for transfection efficiency and extract recovery.

193

194 *Immunocytochemistry and immunoblotting*

195 Hippocampal neuronal cultures from GFPRelA<sup>F/F</sup> mice were fixed at DIV 16 as  
196 described (Boersma et al., 2011) and subjected to immunohistochemistry with the  
197 following primary antibodies: chicken anti-GFP (AVES, GFP-1020,1:1000), rabbit anti-  
198 DsRed (Clontech, 632496, 1:500), and with secondary antibodies FITC anti-chicken  
199 (GeneTex, GTX77185, 1:500) and Alexa Fluor 568 anti-rabbit (Invitrogen,  
200 A11011,1:500) for 1 hour at room temp. in 10% BSA. Cells were mounted in 0.1M n-  
201 propyl gallate in 50% glycerol.

202 For immunoblotting, equivalent total protein levels (by BCA protein assay) from lysates  
203 were resolved by 12.5% SDS-PAGE gel electrophoresis followed by transfer to PVDF  
204 membrane and probed using: anti-p65 (Santa Cruz Biotechnology, sc372, 1:5000),  
205 anti-GFP (Neuromab, N86/8, 1:500 or Molecular Probes, A11122, 1:2000), anti-HSC70  
206 (Santa Cruz Biotechnology, sc-7298, 1:10000).

207

208 *Electromobility shift assay*

209 EMSAs were carried out using nuclear or cytoplasmic extracts prepared from isolated  
210 synaptosomes essentially as described (Meffert et al., 2003) and were reproduced 4  
211 times. Extracts were incubated with a radiolabeled DNA oligonucleotide probe  
212 containing the  $\kappa$ B sequence (wild-type: GGGGACTTTCC, mutant: GTTGACTTTCC).

213

### 214 *Statistical analyses*

215 Graphs illustrate the arithmetic mean and error bars are SEM. For statistical analyses,  
216 unless otherwise noted two-tailed, unequal-variance *t* tests were used with  $\alpha = 0.05$ . For  
217 ANOVA, one-way ANOVA with Bonferroni-Holm correction or Dunnetts correction was  
218 used. For unequal sample sizes, a Kruskal-Wallis test followed by posthoc Dunn's  
219 multiple comparison tests was performed where indicated.

220

## 221 **RESULTS**

### 222 **The p65 subunit of NF- $\kappa$ B is sufficient for localization to isolated synapses**

223 We previously demonstrated that the p65 subunit of NF- $\kappa$ B is present primarily  
224 as a p65:p50 heterodimer in synapses isolated from murine hippocampi  
225 (synaptosomes), and that genetic deletion of p65 led to the absence of NF- $\kappa$ B from  
226 these synapses (Meffert et al., 2003). Multiple functional dimers of NF- $\kappa$ B exist in  
227 mammalian neurons, including p65:p50, p50:p50, and p65:p65 in the murine  
228 hippocampus. To investigate the subunit requirements for localization of NF- $\kappa$ B to  
229 neuronal synapses, we initially evaluated the effect of loss of the p50 subunit on the  
230 presence of NF- $\kappa$ B in isolated synapses. Biochemically isolated hippocampal synapses  
231 (synaptosomes) from mice wild-type for p50 or lacking the p50 subunit of NF- $\kappa$ B were

232 subjected to electromobility shift assays (EMSA) with a radiolabeled DNA probe  
233 containing the  $\kappa$ B sequence and antibody supershifts used to identify discrete NF- $\kappa$ B  
234 subunits. EMSA detects activated NF- $\kappa$ B dimers that are not I $\kappa$ B-bound and so are  
235 able to bind and shift the mobility of the DNA probe. Deoxycholate (DOC), to force  
236 dissociation of I $\kappa$ B, was included in some samples to reveal any occult (I $\kappa$ B bound) NF-  
237  $\kappa$ B, so that we would not fail to identify present but inactive forms of NF- $\kappa$ B (Meffert et  
238 al., 2003). We observed that isolated synapses from p50-deficient mice retained NF- $\kappa$ B  
239 consisting of p65:p65 homodimers as shown by the supershifted band in the presence  
240 of p65 antibody (Figure 1A; representative EMSA from 4 biological replicates). p65:p65  
241 homodimers were present in increased abundance in the absence of the p50, in  
242 comparison to synapses isolated from wild-type neurons which contained predominantly  
243 p65:p50 heterodimers and small amounts of p65:p65 homodimers (Figure 1A). These  
244 results were consistent with p50 (when present) as the known preferred subunit binding-  
245 partner of p65, but demonstrated that, in the absence of p50, p65:p65 homodimers  
246 could localize to synapses. Since NF- $\kappa$ B is not detected in synapses isolated from p65-  
247 deficient neurons (Meffert et al., 2003), these results are collectively consistent with the  
248 p65 subunit being necessary as well as sufficient for significant localization of NF- $\kappa$ B to  
249 isolated hippocampal synapses.

250

## 251 **The p65 subunit of NF- $\kappa$ B, but not the p50 subunit, is enriched within dendritic** 252 **spines**

253 While biochemically isolated synapses can contain both pre-and post-synaptic  
254 elements, our previous work suggested that NF- $\kappa$ B was enriched in dendritic spines, the

255 postsynaptic sites of excitatory synaptic contacts. Green fluorescent protein-tagged p65  
256 (GFPp65) was enriched in spines of intact wild-type hippocampal neurons (Boersma et  
257 al., 2011) in which the p65:p50 dimer of NF- $\kappa$ B predominates (Meffert et al., 2003). To  
258 investigate whether p65 or p50 subunits were responsible for dendritic spine  
259 enrichment, we first excluded the possibility of p50 heterodimerization with p65, by  
260 assaying p50 spine-enrichment in neurons lacking p65. Hippocampal neuronal  
261 cultures from mice harboring a conditional loss of function allele for the RelA gene  
262 (encoding p65 protein, RelA<sup>F/F</sup>) were transduced with lentiviral inducible Cre  
263 recombinase (CreER<sup>T2</sup>) to generate p65-deficient cultures following administration of 4-  
264 hydroxy-tamoxifen (OHT). p65-deficient cultures co-expressing non-tagged mCherry  
265 fluorescent protein (for visualization and quantification) with either GFP-tagged p50  
266 (GFPp50), GFPp65, or GFP alone, were subjected to confocal imaging and analysis for  
267 spine enrichment (calculation described in Materials and Methods). In the absence of  
268 endogenous p65, no spine enrichment of GFPp50 was observed ( $0.9 \pm 1.2\%$ ), while  
269 GFPp65 retained its expected enrichment ( $39.7 \pm 2.08\%$ ,  $p = 3.8 \times 10^{-10}$ ) relative to  
270 GFP (Figure 1B). These results indicate that the p65 subunit of NF- $\kappa$ B is sufficient for  
271 hippocampal spine enrichment, and that p65 likely mediates spine enrichment of the  
272 predominant p65:p50 heterodimer.

273

## 274 **Characterization of spine parameters for p65 enrichment**

275 Variation in the morphological parameters of dendritic spines, including size and  
276 head-to-neck ratio, have been shown to predict features such as spine stability and the  
277 presence of functional synapses (Nimchinsky et al., 2002; Holtmaat and Svoboda,

278 2009). In multiple brain regions, including the hippocampus, larger spine head diameter  
279 relative to neck diameter correlates with increased spine maturity and functional  
280 synapses, in comparison to stubby spines or spines lacking a head (Peters and  
281 Kaiserman-Abramof, 1970; Harris et al., 1992; Hering and Sheng, 2001; Tada and  
282 Sheng, 2006). We next investigated the possibility of a relationship between spine  
283 morphology and the extent of p65 enrichment in dendritic spines. Confocal Z-stacks of  
284 dendritic spines from hippocampal neurons co-expressing GFPp65 and mCherry were  
285 analyzed to calculate the ratio of dendritic spine head diameter to neck diameter (Figure  
286 1C), as well as spine enrichment of GFPp65. Spines were considered any protrusion  
287 between 0.2  $\mu\text{m}$  to 3.0  $\mu\text{m}$  with or without a head. For comparison and based on  
288 published characterizations, spines were classified into 4 categories: spines in which  
289 the head to neck ratio was  $\leq 1$ , between 1 - 3, between 3 - 4, or  $> 4$ . Spines in which  
290 the head to neck diameter ratio was  $\leq 1$  (i.e. lacking a distinct head) did not exhibit  
291 significant enrichment of GFPp65 at the spine terminus (GFPp65 spine enrichment of  
292  $7.99 \pm 6.04\%$ ,  $p = 0.056$  compared to GFP alone) (Figure 1D). In contrast, all three  
293 spine categories with head to neck diameter ratio  $\geq 1$  had significantly more GFPp65  
294 spine enrichment than spines with head to neck ratio  $\leq 1$  ( $p \leq 0.003$ , ANOVA  $p = 0.005$ ,  
295 Dunn test for nonparametric data  $p \leq 0.01$ ). A trend was observed for greater GFPp65  
296 enrichment with increasing spine head to neck ratio: head to neck ratio 1-3 (average  
297 enrichment  $33.57 \pm 2.47\%$ ), head to neck ratio 3 - 4 (average enrichment  $41.41 \pm$   
298  $6.31\%$ ), head to neck ratio  $> 4$  (average enrichment  $46.81 \pm 9.34\%$ ) (Figure 1D), but this  
299 did not reach significance (ANOVA,  $p = 0.159$ ). These data indicated that GFPp65 was  
300 more enriched in head-containing spines with a greater likelihood of mature synaptic

301 connections and suggested the possibility of a role for NF- $\kappa$ B at functional excitatory  
302 synapses.

303

### 304 **p65 expressed from the endogenous locus is enriched in dendritic spines**

305 While expression of exogenous constructs was routinely titrated to the lowest  
306 possible levels, we sought to further test the possibility of inappropriate p65 localization  
307 due to overexpression artifact prior to further investigation. Anti-p65 antibodies  
308 competent for immunoblotting have been identified, however, antibodies capable of  
309 reliable brain immunostaining without staining in p65-deficient brain tissue were not  
310 identified despite candidate screening. For this reason, we proceeded to assess  
311 whether expression from the endogenous locus of p65 would similarly exhibit p65  
312 enrichment in dendritic spines using a homozygous transgenic knock-in mouse line  
313 expressing the fusion protein of GFP and p65 (GFPp65) from the genomic RelA locus  
314 with GFP inserted immediately following the start codon (GFPRelA<sup>ff</sup>) (De Lorenzi et al.  
315 2009). Notably, characterization of this line demonstrates GFPp65 expression to be  
316 equal to endogenous p65 expression in wild-type mice, and to fully rescue endogenous  
317 p65 function (p65 loss is embryonic lethal).

318 Hippocampal cultures from GFPRelA<sup>ff</sup> mice were transfected with mCherry to  
319 permit morphological isolation of individual neurons and enrichment quantification, and  
320 subjected to immunostaining for GFP and mCherry (see Materials and Methods),  
321 followed by confocal microscopy and 3-dimensional analysis of Z-stack projections  
322 (Imaris). p65 expressed from the endogenous locus was enriched in hippocampal  
323 dendritic spines by  $33.5 \pm 6.9\%$  ( $p = 1.36 \times 10^{-5}$ ) relative to non-tagged GFP (Figure 1E);

324 this enrichment was not significantly different from the dendritic spine enrichment of  
325 transiently-transfected GFPp65 as shown in Figure 1B ( $p = 0.27$ ). These results  
326 supported the use of GFPp65 constructs expressed at low levels in subsequent  
327 experiments to investigate the determinants of p65 enrichment.

328

### 329 **A p65 deletion mutant lacking dendritic spine-enrichment**

330 We next engineered a series of deletion and truncation constructs (Figure 2A)  
331 aimed at identifying a mutant of the p65 subunit that would lack dendritic spine-  
332 enrichment and allow us to examine potential physiological roles of a synaptic pool of  
333 NF- $\kappa$ B. All NF- $\kappa$ B subunits share a highly homologous amino-terminal domain, known  
334 as the Rel Homology Domain (RHD), which contains sequences responsible for DNA  
335 binding, dimerization, I $\kappa$ B binding, and nuclear localization. p65 also contains a  
336 carboxy-terminal trans-activation domain (TAD), which is a shared feature of several  
337 NF- $\kappa$ B subunits (Napetschnig and Wu 2013). Amino-terminally GFP-tagged p65  
338 truncations lacking either the carboxy-terminal TAD (p65 $\Delta$ TAD) or the amino-terminal  
339 RHD (p65 $\Delta$ 1-298) were co-expressed with non-tagged mCherry fluorescent protein in  
340 hippocampal pyramidal neurons, subjected to confocal imaging, and found to retain  
341 dendritic spine enrichment that did not significantly differ from wild-type GFPp65 ( $40.8 \pm$   
342  $4.9\%$ ,  $p = 0.813$  and  $40.29 \pm 3.95\%$   $p = 0.980$  respectively,) (Figure 2B and 2C). In  
343 contrast, a p65 truncation consisting solely of the amino-terminal RHD including the  
344 NLS (GFPp65 $\Delta$ 305-551), lacked enrichment in dendritic spines and was not significantly  
345 different in enrichment compared to GFP ( $-4.2 \pm 2.4\%$ ,  $p = 0.142$ ). Collectively these  
346 data, prompted us to focus on the region between the NLS and the TAD of p65, a

347 relatively uncharacterized region with little sequence conservation between NF- $\kappa$ B  
348 subunits, which we suspected might be involved in dendritic spine enrichment.

349 Two constructs with overlapping deletions in p65 between the NLS and TAD  
350 (p65 $\Delta$ 305-406 and p65 $\Delta$ 335-442) were engineered to refine the region required for  
351 enrichment. Equivalent expression of these GFP-tagged constructs in hippocampal  
352 pyramidal neurons co-expressing mCherry revealed that p65 $\Delta$ 335-442 retained  
353 significant enrichment in comparison to GFP alone, while enrichment remained lower  
354 than for full-length p65 ( $19.1 \pm 3.5\%$ ,  $p = 4.67 \times 10^{-5}$  and  $p = 0.002$ ) (Figure 2B,C). In  
355 contrast, p65 $\Delta$ 305-406 lacked significant spine enrichment ( $5.5 \pm 2.2\%$ ,  $p = 0.102$   
356 compared to GFP alone), and we termed this mutant, GFPp65 $\Delta$ SE. All truncation and  
357 deletion p65 constructs were expressed at similar levels, as assessed by visualization  
358 of the GFP-tag in confocal imaging (Figure 2C), and yielded protein products of the  
359 expected molecular weights by immunoblotting of lysates from transfected 293T cells  
360 (Figure 2D).

361 Due to the known participation of NF- $\kappa$ B in apoptotic pathways, we evaluated  
362 GFPp65 $\Delta$ SE expression for potential effects on neuronal cell health prior to proceeding  
363 to other assays of physiological function. Dysregulation of NF- $\kappa$ B signaling in some  
364 contexts can produce apoptosis which has been visualized as fragmented or pyknotic  
365 nuclei or as cytoplasmic blebbing or beading (Baichwal and Baeuerle, 1997). We  
366 assessed cytoplasmic integrity and nuclear morphology by confocal imaging of live  
367 hippocampal neurons expressing either GFP, GFPp65 or GFPp65 $\Delta$ SE for 24 hours,  
368 together with mCherry fluorescent protein to fill the cytoplasm and Hoechst staining to  
369 visualize nuclei. The experimenter was blinded to condition during all imaging and



370 analysis. Quantification showed no differences in cytoplasmic blebbing (GFP: 19.2%, n  
371 = 9 cells; GFPp65: 0%, n = 8; GFPp65 $\Delta$ SE: 12.5%, n = 8) or pyknotic nuclei (GFP:  
372 11.1%, n = 9 cells; GFPp65: 12.5%, n = 8; and GFPp65 $\Delta$ SE: 12.5%, n = 8) between  
373 neurons expressing GFP, GFPp65, or GFPp65 $\Delta$ SE (Figure 2E). In contrast,  
374 cytoplasmic blebbing and pyknotic, condensed and fragmented nuclei were readily  
375 detected in 63.6% and 72.7%, respectively, of control neurons (n = 11) expressing GFP  
376 and treated with the kinase inhibitor, staurosporine (50 nM, 12hr) to induce apoptosis  
377 (Figure 2E). These results indicated that GFPp65 $\Delta$ SE expression did not adversely  
378 affect neuronal health as monitored by nuclear morphology and cytoplasmic  
379 blebbing/beading. We proceeded to assess the transcriptional function of GFPp65 $\Delta$ SE,  
380 in comparison to wild-type p65.

381

### 382 **Non-spine enriched p65 mutant retains basal transcriptional activity**

383 We first examined whether the inherent transcriptional properties of wild-type p65  
384 were altered in GFPp65 $\Delta$ SE. While the region of p65 between the RHD and TAD,  
385 containing the deletion in GFPp65 $\Delta$ SE, has not been previously shown to contain  
386 domains implicated in transcriptional regulation, we directly assessed the inherent  
387 capacity of GFPp65 $\Delta$ SE to induce NF- $\kappa$ B dependent transcription in comparison to wild-  
388 type p65 (GFPp65) by dose titration in an NF- $\kappa$ B reporter assay. This reporter assay  
389 effectively assesses multiple aspects of the NF- $\kappa$ B transcription factor, including  
390 appropriate protein folding, stability, dimerization, DNA-binding, and transactivation  
391 capacity. The relative inherent activity of an NF- $\kappa$ B construct is evaluated by this  
392 reporter assay in heterologous cells, without the need for cellular stimulation to mediate

393 I $\kappa$ B inhibitor degradation, through moderate overexpression of NF- $\kappa$ B subunits which  
394 intentionally outstrips endogenous I $\kappa$ B to allow assessment of transcription activation.  
395 HEK293T cells were co-transfected with NF- $\kappa$ B luciferase reporter and a constitutively  
396 expressed  $\beta$ -galactosidase for normalization, in combination with either full length  
397 GFPp65 or GFPp65 $\Delta$ SE at increasing doses which were titrated for equivalent levels of  
398 protein expression by immunoblot (Figure 3A, right). Full length GFPp65 and  
399 GFPp65 $\Delta$ SE could each similarly activate NF- $\kappa$ B-dependent transcription from the  
400 luciferase reporter across a range of expression levels in the dose titration (Figure 3A,  
401 left). We conclude that deletion of amino acids 305-406 in p65 $\Delta$ SE lacks measurable  
402 impact on the inherent capability of p65 to induce NF- $\kappa$ B-dependent transcription.

403

#### 404 **Non-spine enriched p65 mutant is not activated by a synaptic stimulus**

405 We next conducted experiments in hippocampal pyramidal neurons aimed at  
406 addressing whether loss of spine enrichment might selectively alter NF- $\kappa$ B-dependent  
407 transcription in response to stimuli originating at the excitatory glutamatergic synapses  
408 which occur predominantly on dendritic spines, in comparison to stimuli with a diffuse  
409 origin. Following robust excitatory synaptic activation, suprathreshold ion fluxes or  
410 second messenger signals can traverse from dendritic spines to dendritic and somatic  
411 compartments (Nimchinsky et al., 2002). However, signals (including calcium  
412 elevations) initiated by lower and physiological levels of synaptic activity, can be either  
413 restricted to activated dendritic spines or near-neighbor spines (Nimchinsky et al., 2002;  
414 Noguchi et al., 2005), or diminished prior to reaching the neuronal soma (Andersen et  
415 al., 1980; Yuste et al., 2000). This prompted us to ask whether one role of a spine-

416 localized pool of NF- $\kappa$ B might be to preferentially regulate gene expression in response  
417 to incoming stimuli in which signals are spatially restricted or of greater amplitude near  
418 excitatory synapses on dendritic spines. To test this hypothesis we examined whether  
419 modest excitatory synaptic stimulation could activate NF- $\kappa$ B lacking dendritic spine  
420 enrichment (GFPp65 $\Delta$ SE) as effectively as wild-type NF- $\kappa$ B (GFPp65) which is spine-  
421 enriched. The participation of endogenous p65 was excluded by conducting NF- $\kappa$ B  
422 reporter assays in p65-deficient hippocampal cultures prepared from RelA<sup>fl/fl</sup> mice.  
423 Mature neuronal cultures (DIV20-21, when basal excitatory activity is low) were co-  
424 transfected with NF- $\kappa$ B reporter and constitutively-expressed  $\beta$ -galactosidase, and low  
425 levels of either full-length GFPp65 or GFPp65 $\Delta$ SE. GFPp65 $\Delta$ SE and GFPp65 were  
426 expressed at similar levels as assessed by immunoblot (Figure 3B, inset) and  
427 fluorescence confocal imaging. Neurons were then treated with either stimuli which  
428 enhance endogenous excitatory synaptic transmission or with a diffuse stimulus not  
429 originating at synapses. Synaptic stimulation was delivered using low-dose bicuculline  
430 (30  $\mu$ M for 30 seconds), a GABA<sub>A</sub> receptor inhibitor that enhances endogenous  
431 glutamatergic excitatory transmission, or low-dose glycine (a chemical LTP protocol  
432 stimulating NMDA receptors only at synapses receiving spontaneously released  
433 glutamate)(Fortin et al., 2010; Araki et al., 2015). Calcium ionophore (ionomycin, 2  $\mu$ M)  
434 and phorbol ester (PMA, 50 ng/ml) were used to deliver diffuse generalized stimulation.  
435 Both synaptic and diffuse stimuli have been previously characterized as activators of  
436 endogenous NF- $\kappa$ B (Meffert et al., 2003). In the absence of stimulation, neurons  
437 expressing low level GFPp65 or GFPp65 $\Delta$ SE exhibited similar levels of normalized NF-  
438  $\kappa$ B reporter activity, and stimulations were graphed relative to this level (set as 1.0,

439 Figure 3B). Ionomycin/PMA stimulation equivalently increased NF- $\kappa$ B reporter activity  
440 in neurons expressing either GFPp65 or GFPp65 $\Delta$ SE ( $1.86 \pm 0.09$  and  $1.80 \pm 0.09$  fold,  
441  $p = 0.018$  and  $p = 0.0002$ , respectively, compared to no stimulation). In contrast,  
442 synaptic activation with low dose bicuculline increased NF- $\kappa$ B reporter expression by  
443  $2.58 \pm 0.39$  fold in neurons expressing GFPp65 while neurons expressing GFPp65 $\Delta$ SE  
444 showed no significant response ( $p = 0.0001$  and  $p = 0.389$ , respectively, compared to  
445 no stimulation (Figure 3B). Synaptic stimulation with glycine increased NF- $\kappa$ B reporter  
446 expression by  $2.52 \pm 0.21$  fold in neurons expressing GFPp65 while neurons expressing  
447 GFPp65 $\Delta$ SE showed no significant response ( $p = 0.0001$  and  $p = 0.692$ , respectively,  
448 compared to no stimulation (Figure 3B). Collectively, this data indicates that  
449 GFPp65 $\Delta$ SE, which lacks enrichment at dendritic spines, can support NF- $\kappa$ B-dependent  
450 gene expression in response to a diffuse stimulus, but is ineffective in supporting NF-  
451  $\kappa$ B-dependent gene expression in response to two stimuli originating in the synaptic  
452 compartment. These findings are consistent with a role for the spine-enriched pool of  
453 NF- $\kappa$ B in mediating NF- $\kappa$ B-dependent gene expression in response to excitatory  
454 synaptic stimuli.

455

### 456 **Response to synaptic stimuli requires the canonical NF- $\kappa$ B pathway**

457 Previous work has shown that signaling components required for NF- $\kappa$ B  
458 activation, including degradation of the inhibitor of NF- $\kappa$ B (I $\kappa$ B), are present at synapses  
459 (Meffert et al., 2003). The failure of synaptic stimulation to induce NF- $\kappa$ B-dependent  
460 transcription in neurons lacking spine-enriched NF- $\kappa$ B could be due to a necessity for  
461 localization of the NF- $\kappa$ B/I $\kappa$ B complex in proximity to stimuli incoming at synapses. To

462 test whether synaptic and diffuse stimuli utilize distinct or shared NF- $\kappa$ B induction  
463 pathways, we assessed the effect of inhibition of the canonical activation pathway  
464 through IKK, using both small molecule (Skaug et al., 2011; Liu et al., 2012) and peptide  
465 IKK inhibitors(May et al., 2000; Solt et al., 2007; Solt et al., 2009). The selective small  
466 molecule IKK inhibitor, TPCA-1, or a cell-permeant nemo (IKK $\gamma$ ) binding domain IKK  
467 inhibitor peptide (TAT-NBD) each prevented increased NF- $\kappa$ B activation by diffuse or by  
468 synaptic stimuli (Figure 3C; Ionomycin/PMA, Bicuculline, or Glycine) in hippocampal  
469 neurons, compared to control stimulations in vehicle alone (Ionomycin/PMA:  $1.91 \pm$   
470  $0.24$ ,  $p = 0.043$ , Bicuculline:  $2.72 \pm 0.31$ ,  $p = 0.0001$ , glycine:  $2.41 \pm 0.25$ ,  $p = 0.0007$ ) or  
471 control TAT peptide (Ionomycin/PMA:  $2.01 \pm 0.20$ ,  $p = 0.014$ , Bicuculline:  $2.72 \pm 0.33$ ,  $p$   
472  $= 0.0001$ , glycine:  $2.30 \pm 0.21$ ,  $p = 0.002$ ).). These data demonstrate that NF- $\kappa$ B  
473 activation by diffuse and synaptic stimuli both proceed through the canonical IKK-  
474 dependent pathway, consistent with a difference in localization of the NF- $\kappa$ B complex  
475 near synapses underlying the loss of responsiveness in neurons which were lacking  
476 spine-enriched NF- $\kappa$ B.

477

### 478 **Spine-enriched NF- $\kappa$ B in dendritic spine development**

479 During developmental periods of rapid spine and synapse formation, high basal  
480 levels of excitatory glutamatergic synaptic transmission produce elevated NF- $\kappa$ B  
481 transcriptional activity which is required for the *in vitro* and *in vivo* production of normal  
482 hippocampal pyramidal dendritic spine density, spine maturity, and corresponding  
483 synaptic currents (Boersma et al., 2011; Schmeisser et al., 2012). We harnessed this  
484 assay to further probe function of the spine-enriched pool of NF- $\kappa$ B by testing its

485 requirement in a biologically relevant readout, dendritic spine formation, downstream of  
486 synaptic stimulation. Hippocampal cultures deficient in endogenous p65 (from RelA<sup>f/f</sup>  
487 mice) were transfected with either GFP, wild-type p65 (GFPp65), or the p65 mutant  
488 lacking spine-enrichment (GFPp65 $\Delta$ SE) and pyramidal neurons assayed for dendritic  
489 spine density and spine head volume by live confocal imaging during the period of rapid  
490 spine formation (DIV 14 - 16) (Figure 4). Basal spine density in wild-type neurons  
491 expressing GFP was  $1.89 \pm 0.23$  spines / 10  $\mu\text{m}$ , with an average spine head volume of  
492  $0.217 \pm 0.028 \mu\text{m}^3$ . Loss of p65 (GFP + OHT) decreased spine density by 46.7 % (to  
493  $1.01 \pm 0.08$  spines / 10  $\mu\text{m}$ ) and average spine head volume by 40.4 % (to  $0.129 \pm$   
494  $0.021 \mu\text{m}^3$ ). Expression of GFPp65 in p65-deficient neurons rescued both spine density  
495 ( $2.35 \pm 0.27$  spines / 10  $\mu\text{m}$ ) and spine head volume ( $0.258 \pm 0.021 \mu\text{m}^3$ ) to levels  
496 indistinguishable from wild-type neurons. In contrast, dendritic spine density and  
497 volumes in p65-deficient neurons expressing GFPp65 $\Delta$ SE did not significantly differ  
498 from neurons lacking p65 (GFP + OHT). Expression of GFPp65 $\Delta$ SE in p65-deficient  
499 neurons also failed to rescue spine density ( $1.53 \pm 0.20$  spines / 10  $\mu\text{m}$ ,  $p = 0.03$ ) to  
500 wild-type levels, and showed a corresponding trend toward failed rescue for spine head  
501 volumes ( $0.154 \pm 0.020 \mu\text{m}^3$ ,  $p = 0.073$ ). Endogenous p65 is required for the  
502 development of normal spine size and density. The inability of GFPp65 $\Delta$ SE to mimic  
503 the effects of wild-type p65 on spine density and head volume indicates a critical  
504 biological role for spatial localization of p65 to dendritic spines in supporting spine  
505 growth, which relies upon NF- $\kappa$ B-dependent transcription (Boersma et al., 2011).

506

507 **DISCUSSION**

508           Healthy neural plasticity in the adult brain is enabled by the selective regulation  
509 of gene expression following neuronal activity. Features that enable transcription  
510 factors to differentiate neuronal stimuli, and to produce appropriate gene regulatory  
511 responses are incompletely understood. In this work, we show that the enrichment of a  
512 transcription factor in a discrete subcellular location, the dendritic spine head,  
513 selectively facilitates responses to excitatory activity incoming through synapses, while  
514 not being required for the response to more diffuse neuronal stimulation that does not  
515 originate at synapses.

516           NF- $\kappa$ B is a pleiotropic transcription factor that functions broadly in the control of  
517 genes promoting cellular and synapse growth, and for which evolutionarily conserved  
518 requirements have been established in multiple assays of plasticity, learning, and  
519 memory from crabs to fruit flies to mammals (Shrum and Meffert, 2008; Salles et al.,  
520 2014). The characterization of NF- $\kappa$ B enrichment in dendritic spines presents an  
521 interesting distinguishing feature, as relatively few transcription factors are known to  
522 localize to discrete extranuclear regions. Other notable exceptions include CREB  
523 (which has been reported in axons), and Stat3 and the transcription activator ELK-1  
524 which have been reported in neuronal dendrites (Suzuki et al., 1998). We identify a 101  
525 amino acid region of the p65 NF- $\kappa$ B subunit that is required for NF- $\kappa$ B enrichment in  
526 dendritic spine heads. Overlapping mutants (Figure 2) suggest that the region of  
527 importance for dendritic spine localization may be further narrowed to a 30 amino acid  
528 sequence. No protein-protein or protein-RNA interaction motifs have been previously  
529 characterized in this region of p65, which bears little conservation among other NF- $\kappa$ B  
530 subunits. A motif scan (Scansite 4.0, MIT) does identify a Src homology 3 (SH3)

531 domain poly-proline binding motif in p65 which is conserved across mammals  
532 (beginning at human P322, PRPPP), and is lacking in GFPp65 $\Delta$ SE but present in all  
533 spine-enriched constructs of p65 (Figure 2A,B). Binding of SH3 domains has been  
534 implicated in mediating protein-protein interactions and clustering at synapses; for  
535 example, MAGUK scaffolding proteins contain SH3 domains and are concentrated in  
536 the postsynaptic densities of neuronal synapses (Sheng, 1996; McGee and Bredt,  
537 1999). In previous work (Boersma et al., 2011), we demonstrated that a MAGUK, PSD-  
538 95, is an NF- $\kappa$ B transcriptional target that is critical for NF- $\kappa$ B-mediated increases in  
539 dendritic spine density. Additional analysis of the amino acid region implicated in spine-  
540 enrichment of p65 by charge density showed that it contained the entirety of a long  
541 stretch of uncharged amino acids (82 amino acids). When subjected to analysis for  
542 protein disorder prediction (DISOPRED3, PSIPRED protein sequence analysis UCL;  
543 (Jones and Cozzetto, 2015)) the p65 profile showed that the section implicated in spine  
544 enrichment (amino acids, 305 – 406), was predicted with high confidence to contain an  
545 intrinsically disordered region (IDR, lacking defined and ordered 3D structure). This is  
546 particularly intriguing given the recently heightened interest in potential biological roles  
547 of protein IDRs (Lin et al., 2015; Shin and Brangwynne, 2017; Wei et al., 2017).

548 Biochemical and ionic fluxes between the cytoplasm of spines and neighboring  
549 dendritic shafts can be limited in mature spines, many of which have relatively thin  
550 necks connected to the parent dendrite (Bourne and Harris, 2008; Adrian et al., 2014).  
551 This type of compartmentalization may confer particular value to spine-enrichment of  
552 NF- $\kappa$ B in sensing synaptic excitation and mediating activity-responsive gene expression  
553 in neurons. Previous work has shown that neuronal NF- $\kappa$ B can be activated by sub-



554 membranous calcium elevation signaling through calcium-calmodulin protein kinase II  
555 (CaMKII $\alpha$ , a kinase highly abundant in the post-synaptic density), in hippocampal  
556 neurons as well as in isolated synapses (Meffert et al., 2003). In this report, we  
557 demonstrate a role for local enrichment in dendritic spines in shaping the stimulus  
558 specificity of NF- $\kappa$ B. The p65 mutant engineered to lack spine head enrichment,  
559 p65 $\Delta$ SE, retains inherent NF- $\kappa$ B transcriptional activity and transcriptional response to  
560 diffuse stimulation, but exhibits deficiency in mediating NF- $\kappa$ B-dependent transcription  
561 to modest stimulation incoming through excitatory synapses and fails to support normal  
562 head volume and density of dendritic spines. The enrichment of NF- $\kappa$ B in dendritic  
563 spine heads raises the possibility of a potential contribution of local protein-protein  
564 interactions not requiring transcription to these phenotypes. However, using  
565 transcriptionally-inactive mutants of p65 (including p65 $\Delta$ TAD), we previously found that  
566 activity-dependent enhancement of dendritic spine size and density required cell-  
567 autonomous NF- $\kappa$ B-dependent transcription (Boersma et al., 2011).

568         NF- $\kappa$ B activation by either diffuse or synaptic stimulation required the canonical  
569 IKK-mediated pathway, previously shown to participate in synaptic plasticity (Russo et  
570 al., 2009). This shared feature further supports the importance of subcellular  
571 localization of the initiating stimulus in defining the requirement for spine-enriched NF-  
572  $\kappa$ B. It is possible that enrichment at the sites of incoming excitatory stimuli might also  
573 regulate additional features of gene expression, by impacting the kinetics, magnitude, or  
574 duration of NF- $\kappa$ B induction following stimulation. Since the exact sequence of the NF-  
575  $\kappa$ B DNA-response elements in a promoter/enhancer region is reported to code a

576 preference for binding to (and activation by) particular NF- $\kappa$ B dimers under some  
577 conditions (Wang et al., 2012), selective activation of p65-containing NF- $\kappa$ B dimers that  
578 are spine-enriched might have the potential to impact the specificity of NF- $\kappa$ B-  
579 dependent gene expression. Collectively, this work highlights spine head enrichment as  
580 a feature contributing to activity-responsive gene expression by NF- $\kappa$ B, a transcription  
581 factor implicated in multiple contexts of experience-dependent plasticity.

582

### 583 **AUTHOR CONTRIBUTIONS**

584 E.C.D., M.C.H.B, and M.K.M. conceived and designed the experiments. E.C.D.,  
585 M.C.H.B, and M.K.M performed all experiments and data analyses in the laboratory of  
586 M.K.M. M.K.M. and E.C.D wrote the manuscript. This work was funded by grants to  
587 M.K.M. M.K.M initiated and supervised the project.

588

589

### 590 **REFERENCES**

591

592 Adrian M, Kusters R, Wierenga CJ, Storm C, Hoogenraad CC, Kapitein LC (2014)  
593 Barriers in the brain: resolving dendritic spine morphology and compartmentalization.  
594 *Front Neuroanat* 8:142.

595 Andersen P, Sundberg SH, Sveen O, Swann JW, Wigstrom H (1980) Possible  
596 mechanisms for long-lasting potentiation of synaptic transmission in hippocampal slices  
597 from guinea-pigs. *The Journal of physiology* 302:463-482.

598 Araki Y, Zeng M, Zhang M, Huganir Richard L (2015) Rapid Dispersion of SynGAP from  
599 Synaptic Spines Triggers AMPA Receptor Insertion and Spine Enlargement during LTP.  
600 *Neuron* 85:173-189.

601 Baichwal VR, Baeuerle PA (1997) Activate NF-kappa B or die? *Current biology* : CB  
602 7:R94-96.

603 Boersma MC, Dresselhaus EC, De Biase LM, Mihalas AB, Bergles DE, Meffert MK  
604 (2011) A requirement for nuclear factor-kappaB in developmental and plasticity-

- 605 associated synaptogenesis. *The Journal of neuroscience : the official journal of the*  
606 *Society for Neuroscience* 31:5414-5425.
- 607 Bourne JN, Harris KM (2008) Balancing structure and function at hippocampal dendritic  
608 spines. *Annu Rev Neurosci* 31:47-67.
- 609 De Lorenzi R, Gareus R, Fengler S, Pasparakis M (2009) GFP-p65 knock-in mice as a  
610 tool to study NF-kappaB dynamics in vivo. *Genesis* 47:323-329.
- 611 Fortin DA, Davare MA, Srivastava T, Brady JD, Nygaard S, Derkach VA, Soderling TR  
612 (2010) Long-Term Potentiation-Dependent Spine Enlargement Requires Synaptic Ca<sup>2+</sup>-  
613 Permeable AMPA Receptors Recruited by CaM-Kinase I. *The Journal of neuroscience :*  
614 *the official journal of the Society for Neuroscience* 30:11565-11575.
- 615 Freudenthal R, Romano A (2000) Participation of Rel/NF-kappaB transcription factors in  
616 long-term memory in the crab *Chasmagnathus*. *Brain research* 855:274-281.
- 617 Freudenthal R, Boccia MM, Acosta GB, Blake MG, Merlo E, Baratti CM, Romano A  
618 (2005) NF-kappaB transcription factor is required for inhibitory avoidance long-term  
619 memory in mice. *The European journal of neuroscience* 21:2845-2852.
- 620 Harris KM, Jensen FE, Tsao B (1992) Three-dimensional structure of dendritic spines  
621 and synapses in rat hippocampus (CA1) at postnatal day 15 and adult ages:  
622 implications for the maturation of synaptic physiology and long-term potentiation. *The*  
623 *Journal of neuroscience : the official journal of the Society for Neuroscience* 12:2685-  
624 2705.
- 625 Heckscher ES, Fetter RD, Marek KW, Albin SD, Davis GW (2007) NF-kappaB, IkappaB,  
626 and IRAK control glutamate receptor density at the *Drosophila* NMJ. *Neuron* 55:859-  
627 873.
- 628 Hering H, Sheng M (2001) Dendritic spines: structure, dynamics and regulation. *Nature*  
629 *reviews Neuroscience* 2:880-888.
- 630 Holtmaat A, Svoboda K (2009) Experience-dependent structural synaptic plasticity in  
631 the mammalian brain. *Nature reviews Neuroscience* 10:647-658.
- 632 Jones DT, Cozzetto D (2015) DISOPRED3: precise disordered region predictions with  
633 annotated protein-binding activity. *Bioinformatics* 31:857-863.
- 634 Kaltschmidt B, Ndiaye D, Korte M, Pothion S, Arbibe L, Prullage M, Pfeiffer J, Lindecke  
635 A, Staiger V, Israel A, Kaltschmidt C, Memet S (2006) NF-kappaB regulates spatial  
636 memory formation and synaptic plasticity through protein kinase A/CREB signaling. *Mol*  
637 *Cell Biol* 26:2936-2946.
- 638 Kaltschmidt C, Kaltschmidt B, Baeuerle PA (1993) Brain synapses contain inducible  
639 forms of the transcription factor NF-kappa B. *Mechanisms of development* 43:135-147.

- 640 Lin Y, Protter DSW, Rosen MK, Parker R (2015) Formation and Maturation of Phase  
641 Separated Liquid Droplets by RNA Binding Proteins. *Molecular cell* 60:208-219.
- 642 Liu F, Xia Y, Parker AS, Verma IM (2012) IKK biology. *Immunological Reviews* 246:239-  
643 253.
- 644 May MJ, D'Acquisto F, Madge LA, Glöckner J, Pober JS, Ghosh S (2000) Selective  
645 Inhibition of NF- $\kappa$ B Activation by a Peptide That Blocks the Interaction of NEMO with the  
646 I $\kappa$ B Kinase Complex. *Science* 289:1550-1554.
- 647 McGee AW, Bredt DS (1999) Identification of an intramolecular interaction between the  
648 SH3 and guanylate kinase domains of PSD-95. *The Journal of biological chemistry*  
649 274:17431-17436.
- 650 Meffert MK, Chang JM, Wiltgen BJ, Fanselow MS, Baltimore D (2003) NF-kappa B  
651 functions in synaptic signaling and behavior. *Nature neuroscience* 6:1072-1078.
- 652 Mihalas AB, Araki Y, Hugarir RL, Meffert MK (2013) Opposing action of nuclear factor  
653 kappaB and Polo-like kinases determines a homeostatic end point for excitatory  
654 synaptic adaptation. *The Journal of neuroscience : the official journal of the Society for*  
655 *Neuroscience* 33:16490-16501.
- 656 Nimchinsky EA, Sabatini BL, Svoboda K (2002) Structure and function of dendritic  
657 spines. *Annual review of physiology* 64:313-353.
- 658 Noguchi J, Matsuzaki M, Ellis-Davies GC, Kasai H (2005) Spine-neck geometry  
659 determines NMDA receptor-dependent Ca<sup>2+</sup> signaling in dendrites. *Neuron* 46:609-622.
- 660 Nonaka M, Kim R, Sharry S, Matsushima A, Takemoto-Kimura S, Bito H (2014)  
661 Towards a better understanding of cognitive behaviors regulated by gene expression  
662 downstream of activity-dependent transcription factors. *Neurobiology of learning and*  
663 *memory* 115:21-29.
- 664 O'Riordan KJ, Huang IC, Pizzi M, Spano P, Boroni F, Egli R, Desai P, Fitch O, Malone  
665 L, Ahn HJ, Liou HC, Sweatt JD, Levenson JM (2006) Regulation of nuclear factor  
666 kappaB in the hippocampus by group I metabotropic glutamate receptors. *The Journal*  
667 *of neuroscience : the official journal of the Society for Neuroscience* 26:4870-4879.
- 668 Peters A, Kaiserman-Abramof IR (1970) The small pyramidal neuron of the rat cerebral  
669 cortex. The perikaryon, dendrites and spines. *The American journal of anatomy*  
670 127:321-355.
- 671 Russo SJ et al. (2009) NF $\kappa$ B Signaling Regulates Neuronal Morphology and Cocaine  
672 Reward. *The Journal of neuroscience : the official journal of the Society for*  
673 *Neuroscience* 29:3529-3537.
- 674 Salles A, Romano A, Freudenthal R (2014) Synaptic NF-kappa B pathway in neuronal  
675 plasticity and memory. *Journal of physiology, Paris* 108:256-262.

- 676 Schmeisser MJ, Baumann B, Johannsen S, Vindedal GF, Jensen V, Hvalby OC,  
677 Sprengel R, Seither J, Maqbool A, Magnutzki A, Lattke M, Oswald F, Boeckers TM,  
678 Wirth T (2012) I $\kappa$ B kinase/nuclear factor  $\kappa$ B-dependent insulin-like growth  
679 factor 2 (Igf2) expression regulates synapse formation and spine maturation via Igf2  
680 receptor signaling. *The Journal of neuroscience : the official journal of the Society for*  
681 *Neuroscience* 32:5688-5703.
- 682 Sheng M (1996) PDZs and receptor/channel clustering: rounding up the latest suspects.  
683 *Neuron* 17:575-578.
- 684 Shin Y, Brangwynne CP (2017) Liquid phase condensation in cell physiology and  
685 disease. *Science* 357.
- 686 Shrum CK, Meffert MK (2008) The NF- $\kappa$ B family in learning and memory. In: *Learning*  
687 *And Memory: A Comprehensive Reference* (Byrne J, ed), pp 567 - 586. Oxford: Elsevier  
688 Ltd.
- 689 Skaug B, Chen J, Du F, He J, Ma A, Chen ZJ (2011) Direct, Non-catalytic Mechanism of  
690 IKK Inhibition by A20. *Molecular Cell* 44:559-571.
- 691 Solt LA, Madge LA, May MJ (2009) NEMO-binding Domains of Both IKK $\alpha$  and IKK $\beta$   
692 Regulate I $\kappa$ B Kinase Complex Assembly and Classical NF- $\kappa$ B Activation. *The Journal of*  
693 *biological chemistry* 284:27596-27608.
- 694 Solt LA, Madge LA, Orange JS, May MJ (2007) Interleukin-1-induced NF- $\kappa$ B Activation  
695 Is NEMO-dependent but Does Not Require IKK $\beta$ . *The Journal of biological chemistry*  
696 282:8724-8733.
- 697 Suzuki T, Usuda N, Ishiguro H, Mitake S, Nagatsu T, Okumura-Noji K (1998)  
698 Occurrence of a transcription factor, cAMP response element-binding protein (CREB),  
699 in the postsynaptic sites of the brain. *Brain research Molecular brain research* 61:69-77.
- 700 Tada T, Sheng M (2006) Molecular mechanisms of dendritic spine morphogenesis.  
701 *Current opinion in neurobiology* 16:95-101.
- 702 Wang VY, Huang W, Asagiri M, Spann N, Hoffmann A, Glass C, Ghosh G (2012) The  
703 transcriptional specificity of NF- $\kappa$ B dimers is coded within the  $\kappa$ B DNA  
704 response elements. *Cell Rep* 2:824-839.
- 705 Wei M-T, Elbaum-Garfinkle S, Holehouse AS, Chen CC-H, Feric M, Arnold CB,  
706 Priestley RD, Pappu RV, Brangwynne CP (2017) Phase behaviour of disordered  
707 proteins underlying low density and high permeability of liquid organelles. *Nat Chem*  
708 9:1118.
- 709 Yuste R, Majewska A, Holthoff K (2000) From form to function: calcium  
710 compartmentalization in dendritic spines. *Nature neuroscience* 3:653-659.

712

713 **Figure Legends:**

714 **Figure 1:** *p65 is sufficient for NF- $\kappa$ B enrichment in dendritic spines of hippocampal*  
715 *pyramidal neurons.* A) EMSA from synapses isolated from wild-type (p50<sup>+/+</sup>) or p50-  
716 deficient (p50<sup>-/-</sup>) murine hippocampi. NF- $\kappa$ B was detected using a radiolabelled  
717 oligonucleotide  $\kappa$ B probe and specific subunits identified by antibody-supershifted  
718 bands. DOC was used to allow detection of occult (inactive) NF- $\kappa$ B. p65:p65  
719 homodimers detected in p50<sup>-/-</sup> isolated synapses from all (4) biological replicates of the  
720 experiment. B) Confocal images of live DIV17 hippocampal neurons co-expressing  
721 mCherry with either GFP, GFPp65 or GFPp50, as indicated. Graph shows %  
722 enrichment of GFPp65 or GFPp50, relative to GFP, as described in Materials and  
723 Methods. Scale bar = 5  $\mu$ m. Error bars show SEM. \* $p = 3.8 \times 10^{-10}$ . C) Diagram  
724 representing spine measurements; dashed lines indicate diameter. D) Analysis of spine  
725 maturity from dendrites expressing GFPp65. Percent enrichment of GFPp65 in  
726 dendritic spines is calculated and binned according to spine size. Spine size was  
727 determined by a ratio of the spine head diameter to the spine neck diameter. Scale bar  
728 = 1  $\mu$ m. Error bars show SEM. \* $p$ -values as compared to enrichment for spines <1 are  
729 as follows: for 1-3  $p = 0.004$ , for 3-4  $p = 0.002$ , for >4  $p = 0.003$ . E) Confocal images of  
730 hippocampal pyramidal neurons co-expressing GFP and mCherry (left) or expressing  
731 mCherry fluorescent protein and GFPp65 from the endogenous RelA locus (right) and  
732 immunostained for GFP and mCherry. Graph shows percent enrichment of GFP and  
733 endogenously expressed GFPp65. Scale bar = 5  $\mu$ m. Error bars show SEM. \* $p =$   
734  $1.4 \times 10^{-5}$ .

735

736 **Figure 2:** *Identification of non-spine enriched mutants of p65.* A) Diagram of p65 and  
737 p65 deletion and truncation constructs. B) Graph showing % enrichment of GFP-  
738 tagged p65 and GFP-tagged p65 deletion and truncation constructs. Enrichment is  
739 determined as described in Materials and Methods. Error bars show SEM. \**p*-values as  
740 compared to GFP condition are as follows: for GFPp65  $p = 2.5 \times 10^{-30}$ , for GFPp65 $\Delta$ 1-  
741 298  $p = 4.7 \times 10^{-15}$ , for GFPp65 $\Delta$ 335-442  $p = 9.5 \times 10^{-8}$ , and # data from GFPp65 $\Delta$ TAD  
742 condition was previously presented (Boersma et al., 2011) in a different format. C)  
743 Representative confocal images from live murine hippocampal neurons co-expressing  
744 mCherry with GFP-tagged p65 deletion or truncation constructs or wild-type p65. Scale  
745 bar = 5  $\mu$ m. D) p65 constructs were expressed in 293T cells at equivalent levels and  
746 migrate at their expected molecular weights by immunoblot of lysates. Expected  
747 molecular weights (kDa) as follows: GFPp65: 87, GFPp65 $\Delta$ TAD: 76, GFPp65 $\Delta$ 1-298:  
748 53, GFPp65 $\Delta$ 1002-1326: 76, GFPp65 $\Delta$ 916-1218: 76, GFPp65 $\Delta$ 305-551: 62, GFP: 27.  
749 E) Expression of p65 constructs does not significantly alter measures of neuronal  
750 health. Percent of neurons scoring positive in confocal imaging for cytoplasmic  
751 blebbing/beading or for pyknotic nuclear morphology using Hoechst staining from  
752 hippocampal neurons co-expressing mCherry with either GFP, GFPp65, or  
753 GFPp65 $\Delta$ SE. Staurosporine treatment of GFP-expressing neurons serves as a positive  
754 control; experimenter was blinded to condition during all imaging and analysis. Cells  
755 were scored as positive or negative (see Materials and Methods) and percent positive  
756 plotted per condition (precluding SEM calculation).

757

758 **Figure 3:** *A p65 mutant lacking spine-enrichment is selectively deficient in response to*  
759 *synaptic stimulation.* A) Inherent transactivation potential of wild-type p65 and p65  
760 lacking spine-enrichment (p65 $\Delta$ SE) are not distinguishable. Reporter assay for dose-  
761 titrated expression of GFPp65 or GFPp65 $\Delta$ SE in HEK293T cells co-expressing NF- $\kappa$ B  
762 luciferase reporter and constitutive  $\beta$ -galactosidase used for normalization (Left). Fold  
763 induction calculated as described in Materials and Methods. Representative  
764 immunoblot of dose titration (Right). B) NF- $\kappa$ B luciferase assay of p65-deficient  
765 neurons expressing full length GFPp65 or GFPp65 $\Delta$ SE and either mock-stimulated or  
766 stimulated with bicuculline (30  $\mu$ M for 30 seconds), with ionomycin/PMA (3.5 hr), or with  
767 glycine (100  $\mu$ M for 10 min). \* $p$  = 0.018 compared to GFPp65 no stimulation. \*\* $p$  =  
768 0.0002 compared to GFPp65 $\Delta$ SE no stimulation. \*\*\*\* $p$  = 0.0001 compared to GFPp65  
769 no stimulation. For neurons expressing GFPp65 $\Delta$ SE, NF- $\kappa$ B reporter activity in  
770 response to bicuculline or glycine does not differ significantly from the no stimulation  
771 condition. Representative immunoblot (inset) illustrating similar levels of expressed  
772 protein for GFPp65 or GFPp65 $\Delta$ SE in these experiments. C) NF- $\kappa$ B luciferase assay of  
773 wild-type neurons either mock-stimulated or stimulated with ionomycin/PMA (2  $\mu$ M and  
774 50 ng/ml), bicuculline (30  $\mu$ M for 30 seconds), or with glycine (150  $\mu$ M for 10 min) and  
775 treated with either TPCA1 (4  $\mu$ M) or TAT-NBD (20  $\mu$ M) or their respective vehicle or  
776 TAT controls. \* $p$  = 0.04, \*\*\* $p$  = 0.0007, \*\*\*\* $p$  = 0.0001, all compared to no stimulation  
777 which was set to 1. Error bars indicate SEM.

778

779 **Figure 4:** *p65 lacking spine-enrichment fails to rescue neuronal dendritic spine density*  
780 *and size during spinogenesis.* Loss of endogenous p65 (OHT) in pyramidal neurons



781 (DIV 15-16) significantly decreases dendritic spine density (GFP + OHT,  $*p = .0047$ ,  
782 panel A) and spine head volume (GFP + OHT,  $*p = 0.0151$ , panel C), compared to  
783 GFP. A) Expression of wild-type p65 (GFPp65,  $p = 0.212$ ), but not p65 lacking spine  
784 enrichment (GFPp65 $\Delta$ SE,  $*p = 0.024$ ), rescues dendritic spine density back to baseline  
785 (GFP) levels in hippocampal pyramidal neurons conditionally deficient in p65 (OHT)  
786 (ANOVA,  $p = 0.0009$ ). B) Representative confocal projections (with co-expressed  
787 mCherry) of dendrites from live murine hippocampal neurons used to calculate spine  
788 densities (A). Scale bar = 5  $\mu$ m. C) Expression of wild-type p65 (GFPp65,  $p = 0.262$ )  
789 rescues spine head volume back to baseline (GFP) levels in p65-deficient hippocampal  
790 pyramidal neurons. Expression of GFPp65 $\Delta$ SE shows a trend towards failed rescue of  
791 spine head volume ( $p = 0.073$ , compared to GFP) (ANOVA,  $p = 0.0056$ ) and spine head  
792 volumes which are significantly different from GFPp65-expressing neurons ( $\#$ ,  $p =$   
793  $0.0006$ , compared to GFPp65 + OHT). D) Representative confocal projections (with co-  
794 expressed mCherry) from live murine hippocampal neurons used to calculate spine  
795 head volumes (C). Scale bar = 1.0  $\mu$ m. Error bars indicate SEM.

796

797

**A**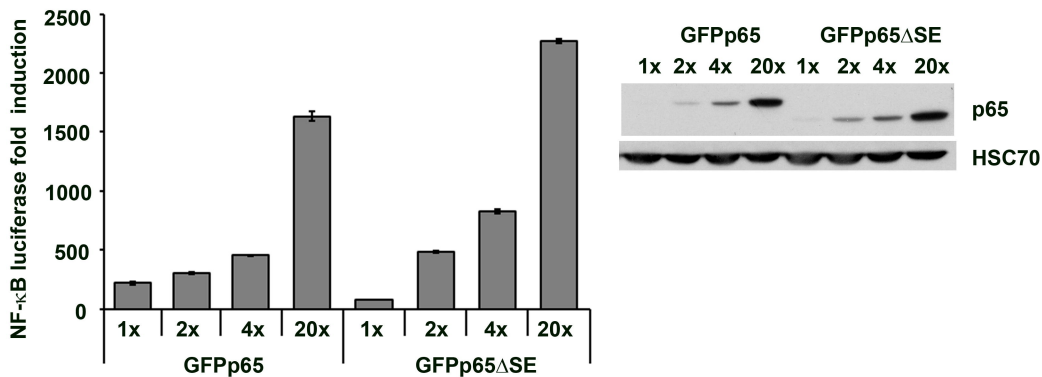**B**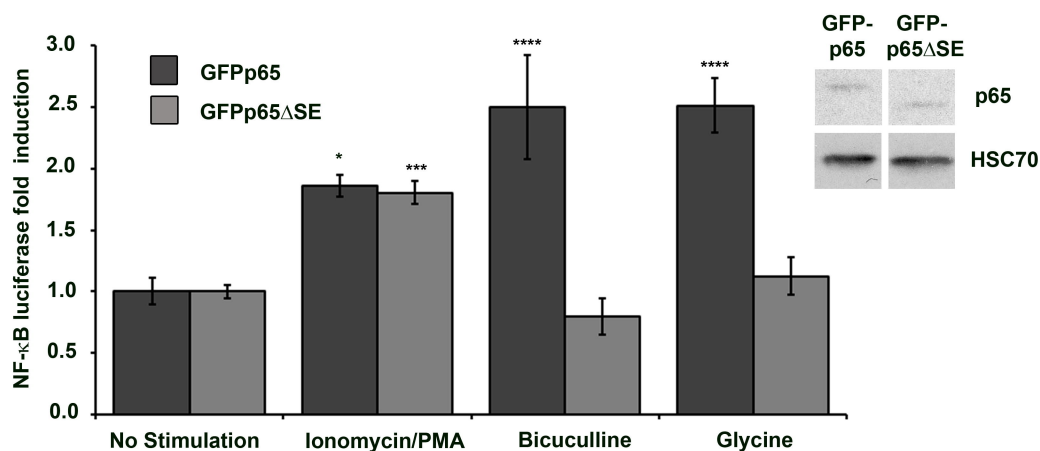**C**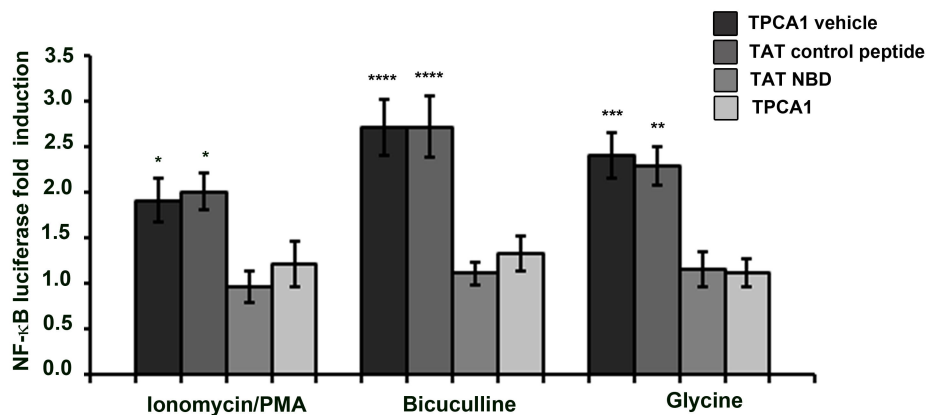

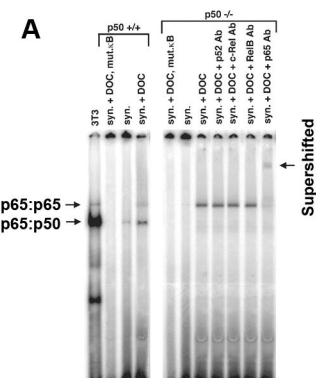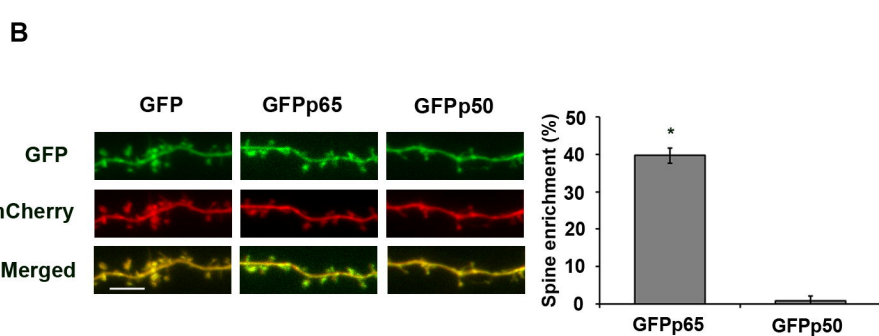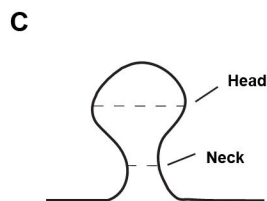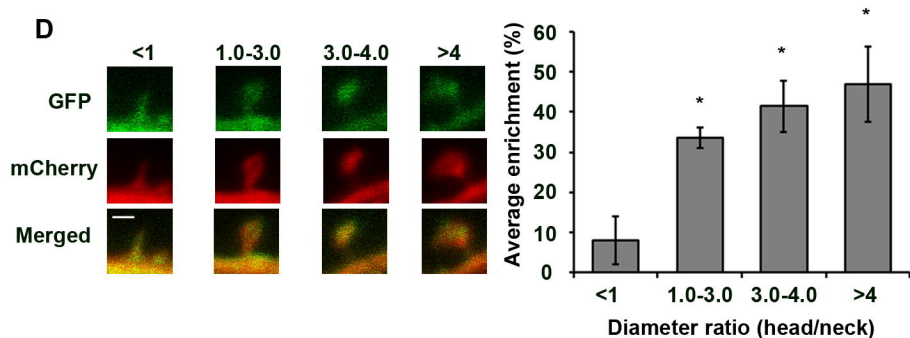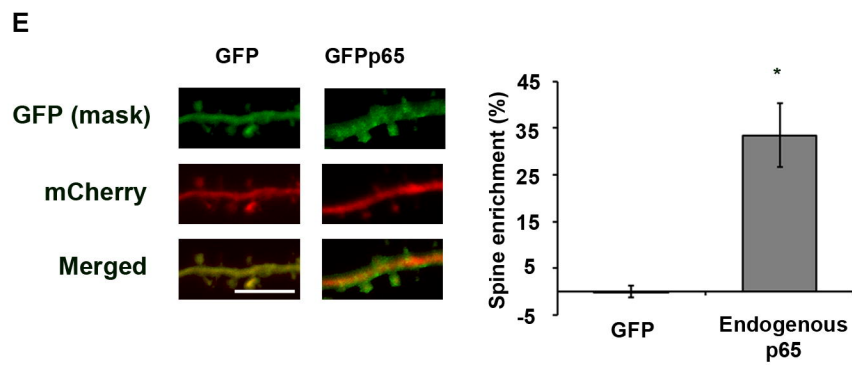

**A**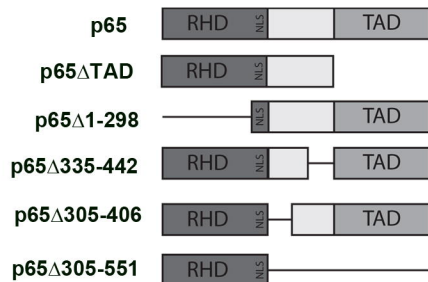**B**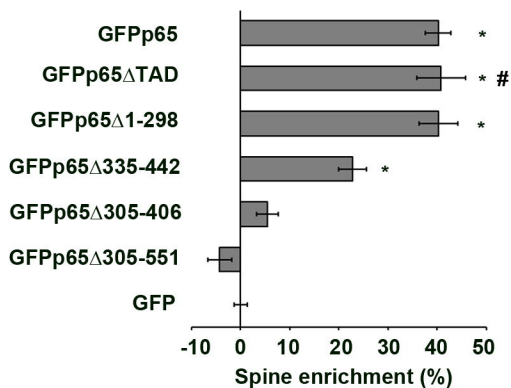**C**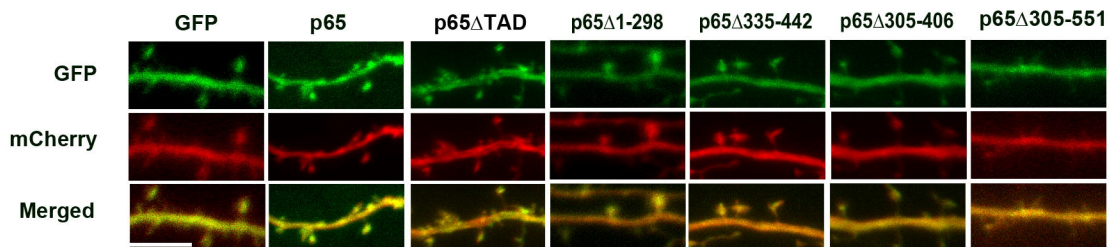**D**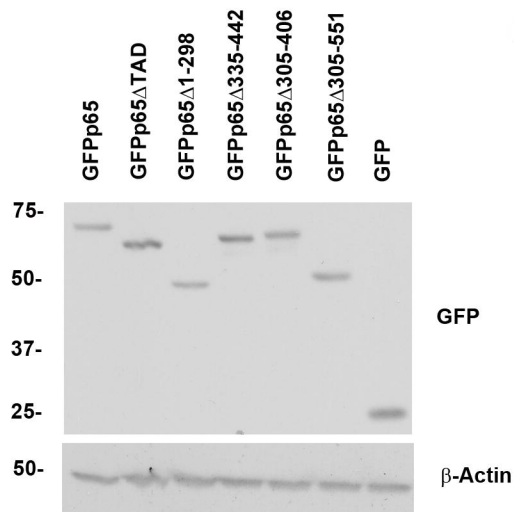**E**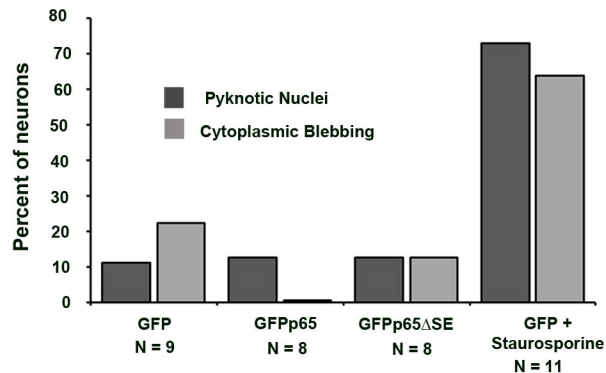

**A**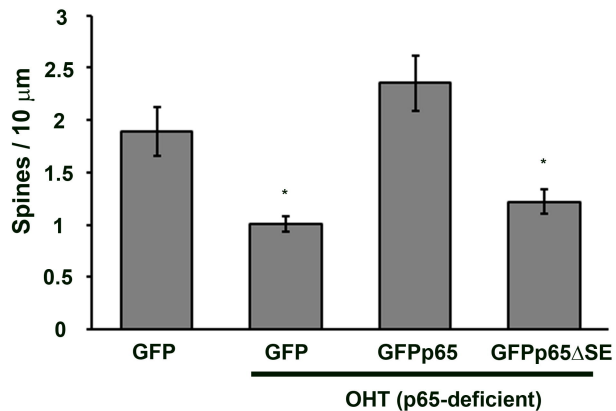**B**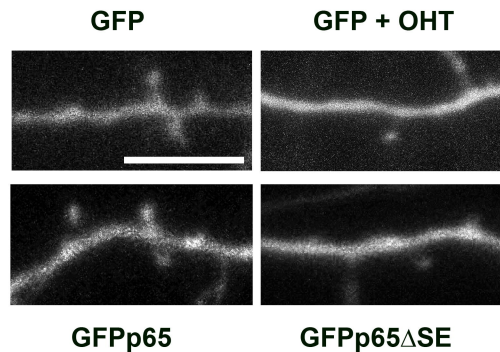**C**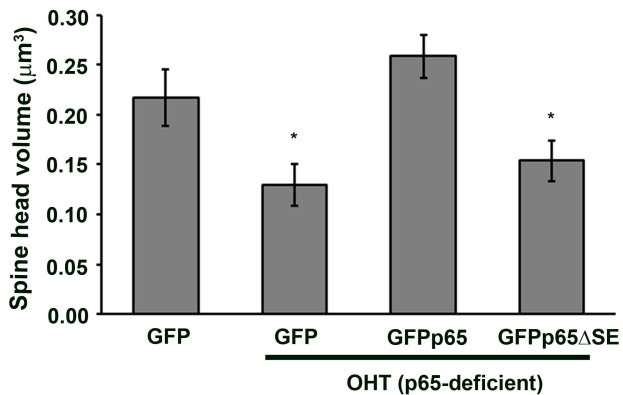**D**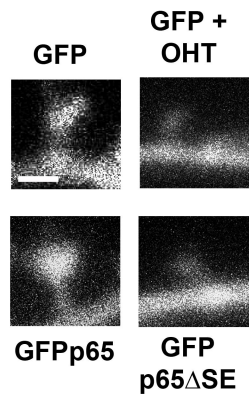

Source: https://www.biorxiv.org/content/10.1101/283879v1.full.pdf
